# Supplementary material for: Giant enhancement of anti-quenching upconversion luminescence in Sc2W3O12:Er3+/Yb3+ phosphors for temperature sensing
Source: Royal Society of Chemistry journal article supplement (doi:10.1039/d4tc01673d), 2024-01-01
Supplement: d4tc01673d1.pdf [file d4tc01673d1.pdf]

## **Giant enhancement of anti-quenching upconversion luminescence in**

### **Sc<sub>2</sub>W<sub>3</sub>O<sub>12</sub>:Er<sup>3+</sup>/Yb<sup>3+</sup> phosphors for temperature sensing**

Xufang Wang<sup>a</sup>, Ping Zhang<sup>a</sup>, Xianglong Xiao<sup>a</sup>, Ruoshan Lei<sup>a</sup>, Lihui Huang<sup>a</sup>, Shiqing Xu<sup>a</sup>, Shilong Zhao<sup>a,\*</sup>, Xiuli Wang<sup>b,\*</sup>

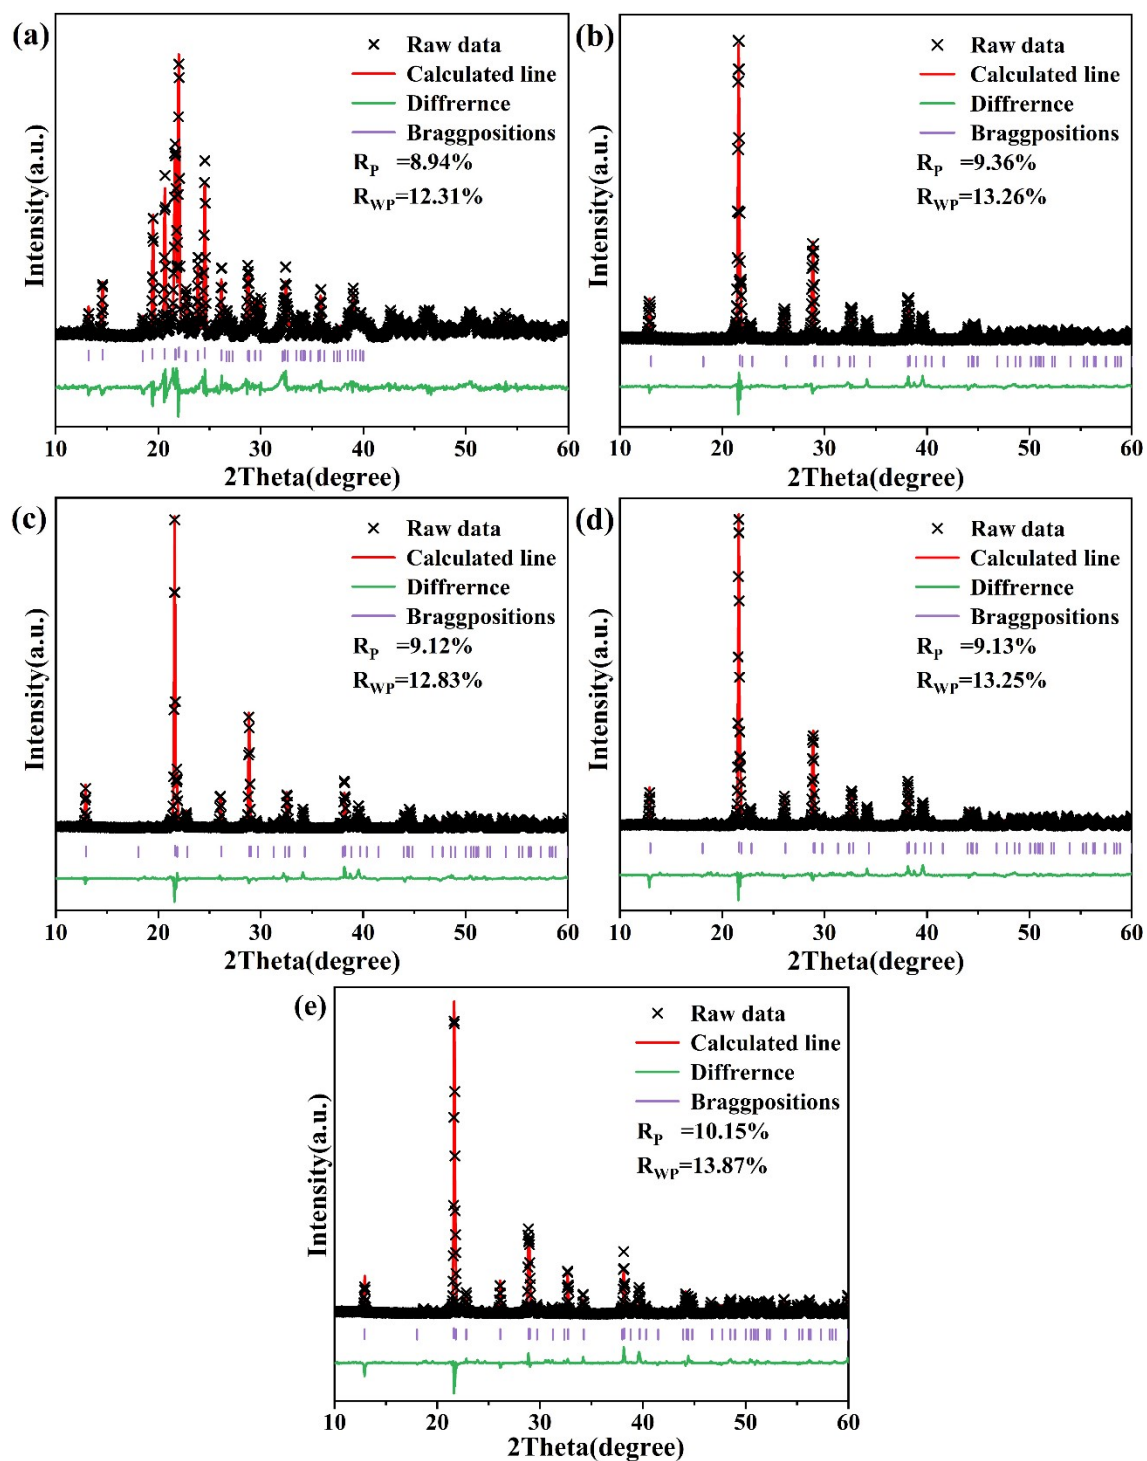

Fig.S1 Rietveld analysis of  $(\text{KMg})_x\text{Sc}_{2-x}\text{W}_3\text{O}_{12}$ : 1 mol%Er<sup>3+</sup>/20 mol%Yb<sup>3+</sup> ( $x = 0, 0.5, 0.6, 0.75, 1, 1.25$ ) phosphor.

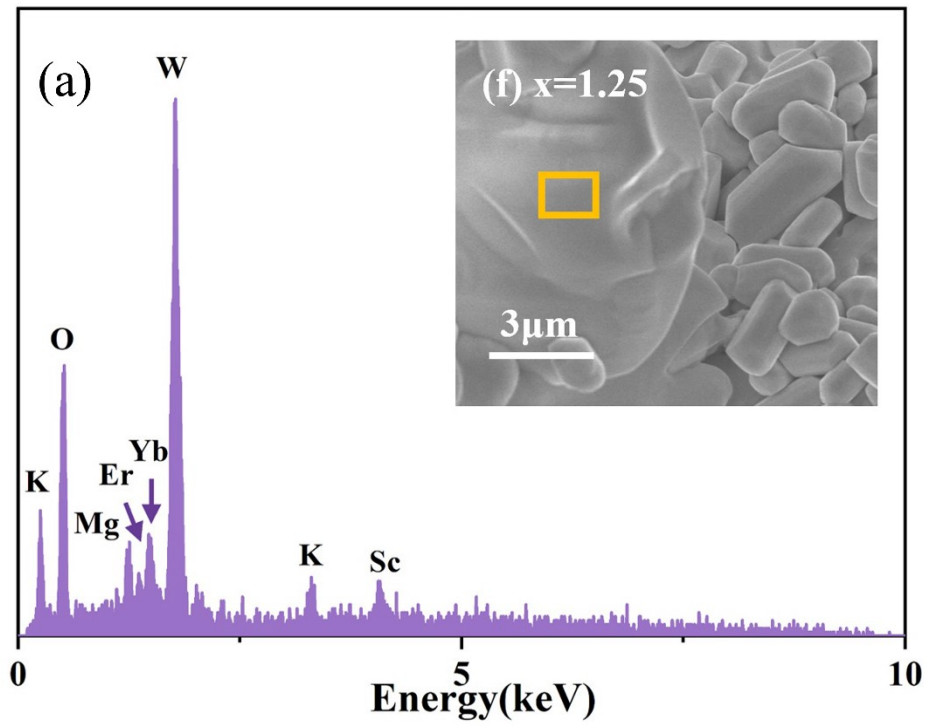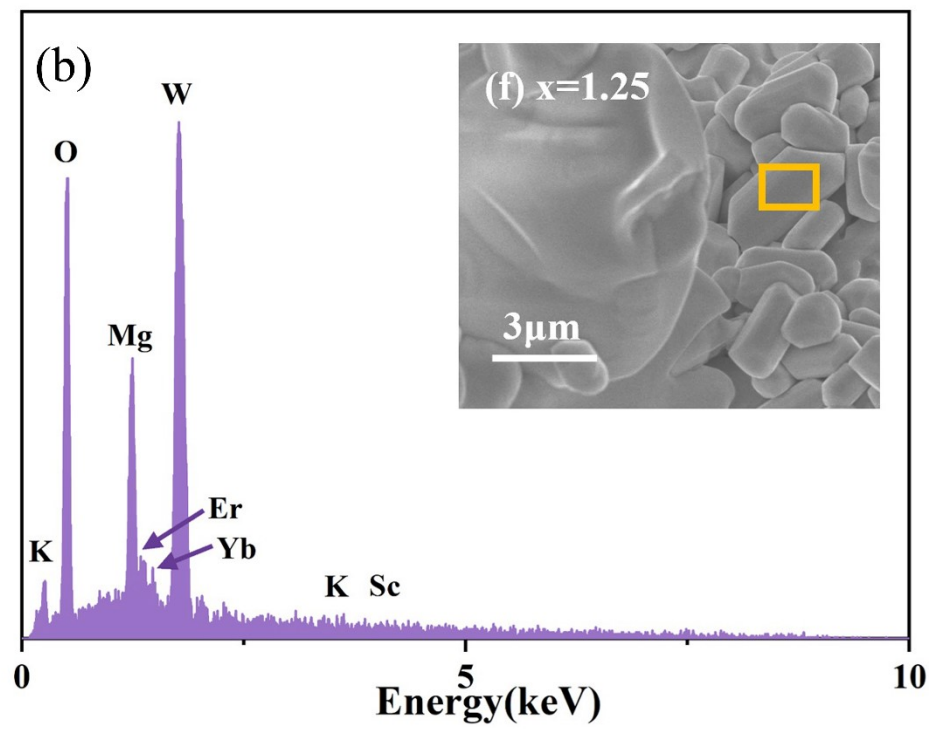

Fig.S2 EDX spectra of different particles in  $(\text{KMg})_{1.25}\text{Sc}_{0.75}\text{W}_3\text{O}_{12}:1 \text{ mol}\% \text{Er}^{3+}/20 \text{ mol}\% \text{Yb}^{3+}$  phosphors.

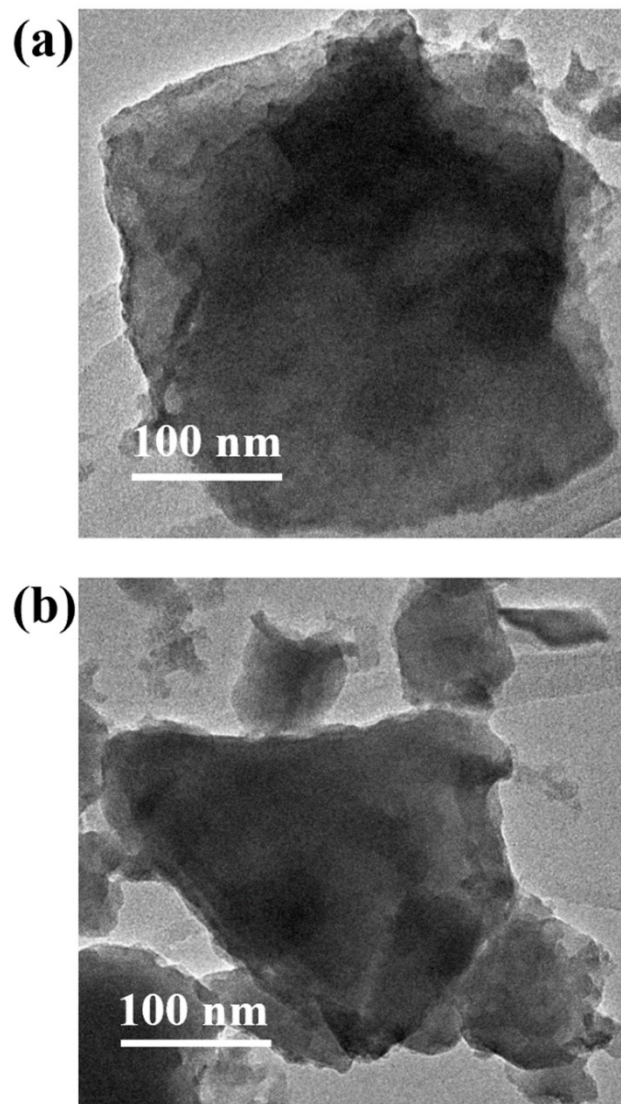

**Fig.S3** (a,b) TEM image of  $(\text{KMg})\text{ScW}_3\text{O}_{12}:1 \text{ mol}\% \text{Er}^{3+}/20 \text{ mol}\% \text{Yb}^{3+}$  phosphors.

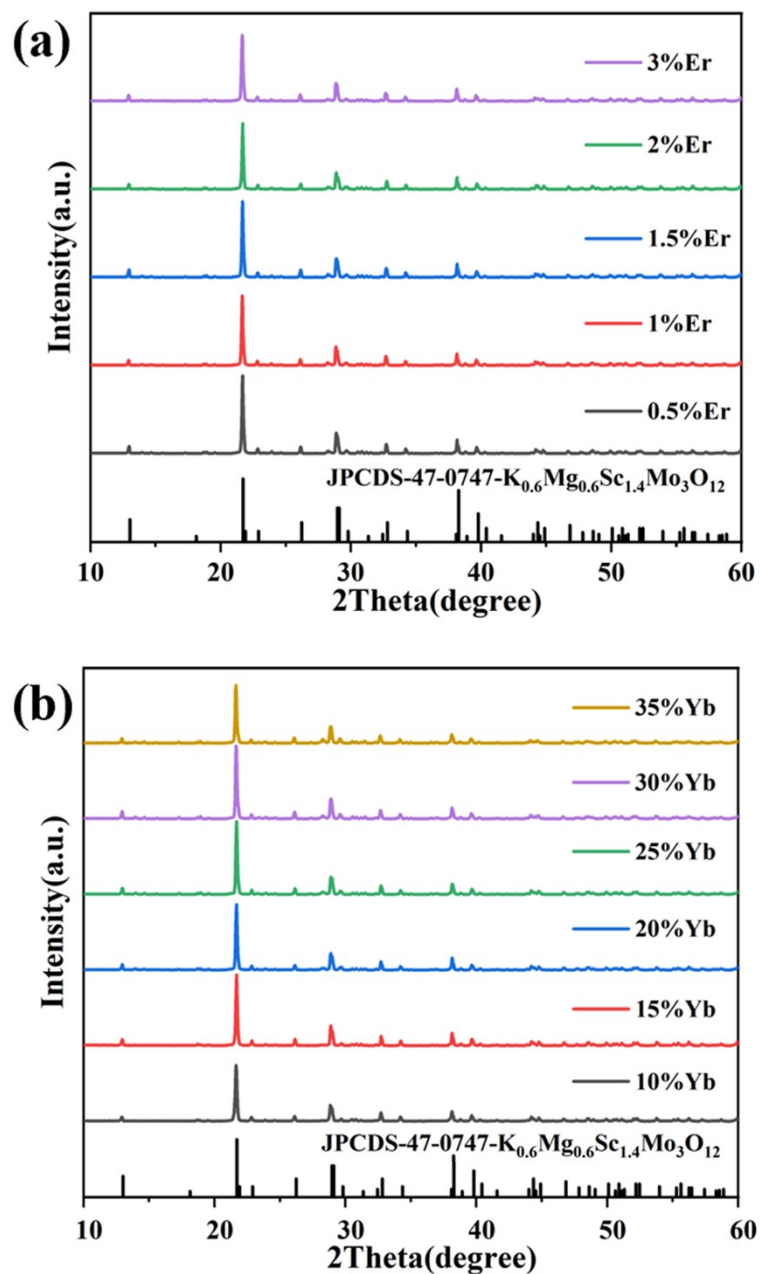

**Fig.S4** XRD patterns of (a)  $(\text{KMg})\text{ScW}_3\text{O}_{12}$ :  $a$  mol% $\text{Er}^{3+}$ /20 mol% $\text{Yb}^{3+}$  ( $a = 0.5, 1, 1.5, 2, 3$ ) and (b)  $(\text{KMg})\text{ScW}_3\text{O}_{12}$ : 2 mol% $\text{Er}^{3+}$ / $b$  mol% $\text{Yb}^{3+}$  ( $b = 10, 15, 20, 25, 30, 35$ ).

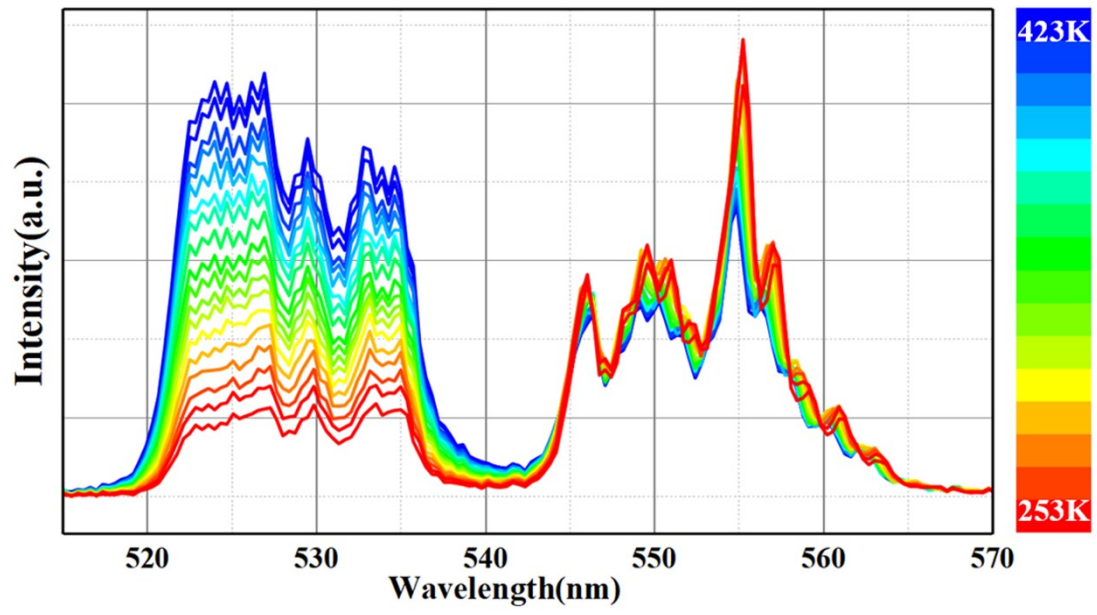

Fig.S5 The dependence of green upconversion emission spectra on the temperature based on fiber optic system.

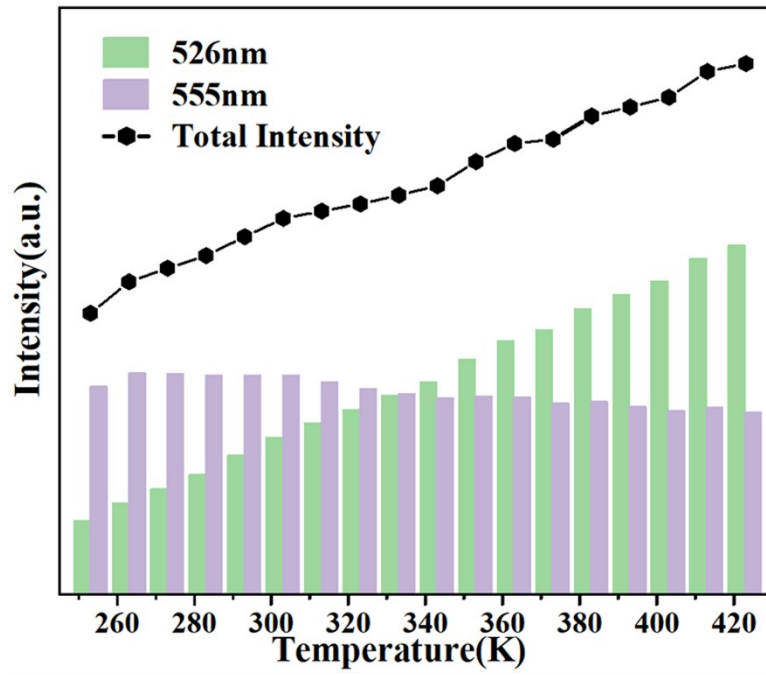

**Fig.S6** The dependence of integrated upconversion intensity on temperature.

Table S1 Temperature sensing properties of A<sub>2</sub>M<sub>3</sub>O<sub>12</sub> material

| Materials                                              | Temperature range(K) | S <sub>a</sub> (K <sup>-1</sup> ) | S <sub>r</sub> (K <sup>-1</sup> ) | Ref.      |
|--------------------------------------------------------|----------------------|-----------------------------------|-----------------------------------|-----------|
| Y <sub>2</sub> Mo <sub>3</sub> O <sub>12</sub> :Er/Yb  | 303-583              | 0.0068                            | 0.0097                            | S1        |
| Y <sub>2</sub> W <sub>3</sub> O <sub>12</sub> :Er/Yb   | 303-523              | 0.0041                            | 0.0093                            | S2        |
| Al <sub>2</sub> Mo <sub>3</sub> O <sub>12</sub> :Er/Yb | 303-603              | 0.0111                            | 0.0109                            | S3        |
| Sc <sub>2</sub> Mo <sub>3</sub> O <sub>12</sub> :Er/Yb | 303-573              | 0.0001                            | 0.0106                            | S4        |
| Sc <sub>2</sub> W <sub>3</sub> O <sub>12</sub> :Er/Yb  | 403-753              | 0.008                             | 0.0083                            | S5        |
| (KMg)ScW <sub>3</sub> O <sub>12</sub> :Er/Yb           | 253-573              | 0.0117                            | 0.0165                            | This work |

**Reference:**

- [S1] H. Lv, P. Du, L. Luo, W. Li. *Adv. Mater.*, 2021, **2**, 2642.  
[S2] X. Lai, W. Li, L. Luo, P. Du. *J.Alloy.Comp.*, 2024, **976**, 173311.  
[S3] H. Lv, L. Liu, D. Wang, Z. Mai, F. Yan, G. Xing, P. Du. *J. Lumin.*, 2022, **252**, 119333.  
[S4] W. Liu, S. Xu, L. Lei. *Opt. Mater.*, 2023, **143**, 114166.  
[S5] Q. Wang, J. Wen, J. Zheng, Q. Xia, C. Wei, X. Huang, Z. Mu, F. Wu. *J. Lumin.*, 2022, **252**, 119306.



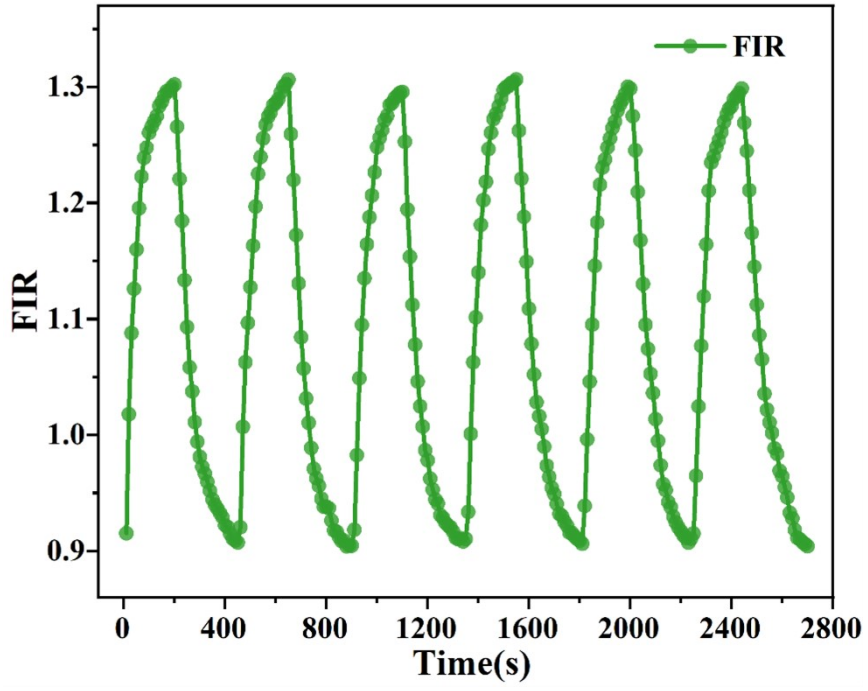

Fig.S7 FIR changes in CPU thermal cycling testing.

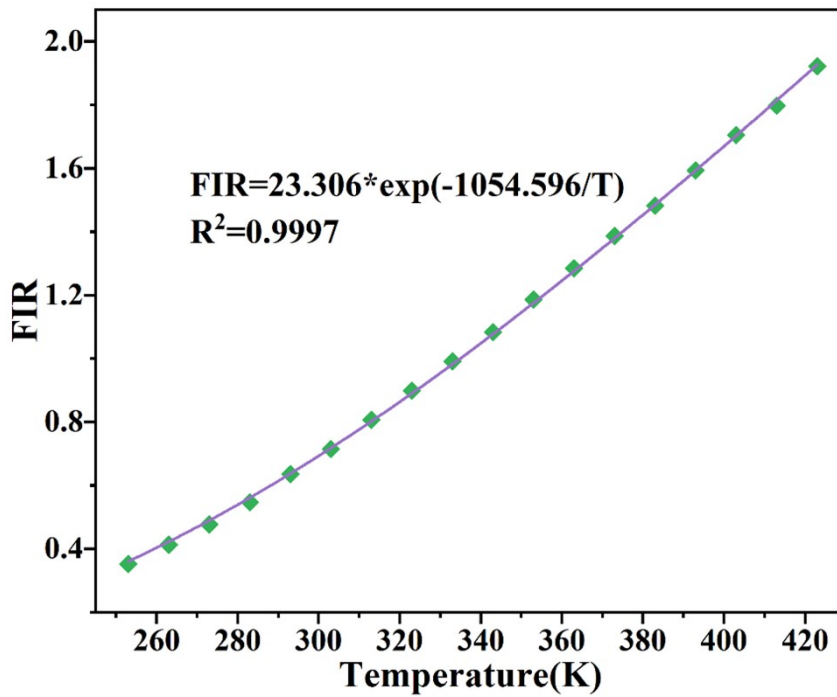

**Fig.S8** Linear fit between FIR and temperature in thermostat bath testing.
